# Supplementary material
Source: PubMed Central journal article supplement (PMC2495061)
Supplement: mmc1.pdf [file mmc1.pdf]

## Supplemental Data

### Maternally Inherited Birk Barel Mental Retardation

### Dysmorphism Syndrome Caused by a Mutation in the

### Genomically Imprinted Potassium Channel *KCNK9*

Ortal Barel, Stavit A. Shalev, Rivka Ofir, Asi Cohen, Joel Zlotogora, Zamir Shorer, Galia Mazor, Gal Finer, Shareef Khateeb, Noam Zilberberg, and Ohad S. Birk

#### Chromosome 1

| Marker  | 5   |     | 20  |     | 18  |     | 1   |     | 12  |     | 11  |     | 7   |     | 21  |     | 24  |     | 8   |     | 25  |     | 26  |     | Size    |
|---------|-----|-----|-----|-----|-----|-----|-----|-----|-----|-----|-----|-----|-----|-----|-----|-----|-----|-----|-----|-----|-----|-----|-----|-----|---------|
| D1S468  | 203 | 211 | 203 | 207 | 203 | 209 | 203 | 211 | 203 | 209 | 202 | 211 | 203 | 193 | 203 | 203 | 203 | 209 | 193 | 203 | 193 | 211 | 203 | 209 | 193-213 |
| D1S214  | 126 | 126 | 126 | 126 | 126 | 142 | 126 | 126 | 126 | 144 | 126 | 142 | 126 | 144 | 126 | 144 | 144 | 146 | 126 | 142 | 126 | 140 | 142 | 144 | 122-152 |
| D1S450  | 340 | 344 | 340 | 338 | 340 | 344 |     |     | 336 | 334 | 332 | 334 | 336 | 334 | 336 | 334 | 336 | 334 | 334 | 348 | 334 | 336 | 336 | 336 | 316-340 |
| D1S2667 | 136 | 155 | 136 | 143 | 136 | 145 | 143 | 155 | 143 | 130 | 155 | 149 | 145 | 151 | 151 | 155 | 145 | 143 | 145 | 143 | 145 | 151 | 147 | 143 | 128-156 |
| D1S2697 | 302 | 302 | 302 | 302 | 302 | 300 | 294 | 302 | 294 | 300 | 302 | 294 | 302 | 298 | 302 | 298 | 302 | 298 | 298 | 300 | 298 | 294 | 302 | 300 | 291-305 |
| D1S199  | 115 | 101 | 115 | 115 | 115 | 105 | 115 | 105 | 115 | 105 | 119 | 105 | 105 | 101 | 105 | 105 | 105 | 105 | 105 | 115 | 105 | 117 | 115 | 107 | 99-125  |
| D1S234  | 276 | 273 | 276 | 271 | 276 | 271 | 274 | 276 | 274 | 271 | 274 | 271 | 271 | 271 | 271 | 271 | 271 | 271 | 274 | 274 | 272 | 274 | 274 | 274 | 268-288 |
| D1S255  | 94  | 104 | 94  | 100 | 94  | 104 | 94  | 104 | 94  | 94  | 94  | 94  | 94  | 94  | 94  | 98  | 94  | 98  | 104 | 94  | 104 | 102 | 100 | 104 | 91-111  |
| D1S2797 | 120 | 122 | 120 | 130 | 122 | 126 | 120 | 122 | 120 | 124 | 120 | 124 | 124 | 126 | 124 | 126 | 124 | 124 | 126 | 126 | 124 | 126 | 120 | 126 | 102-138 |
| D1S2890 | 218 | 218 | 218 | 218 | 218 | 214 | 218 | 218 | 218 | 218 | 218 | 218 | 224 | 230 | 224 | 228 | 224 | 228 | 230 | 230 | 230 | 214 | 214 | 230 | 214-238 |
| D1S230  | 154 | 156 | 154 | 160 | 156 | 158 | 154 | 156 | 154 | 164 | 154 | 160 | 154 | 164 | 154 | 154 | 154 | 164 | 164 | 160 | 164 | 154 | 164 | 160 | 154-166 |
| D1S2841 | 244 | 244 | 244 | 244 | 244 | 246 | 244 | 244 | 244 | 252 | 244 | 237 | 248 | 248 | 248 | 244 | 248 | 242 | 237 | 244 | 237 | 244 | 244 | 248 | 234-254 |
| D1S207  | 154 | 166 | 154 | 170 | 154 | 154 | 166 | 154 | 166 | 166 | 154 | 166 | 166 | 161 | 154 | 166 | 166 | 152 | 154 | 170 | 154 | 154 | 154 | 162 | 149-179 |
| D1S2868 | 218 | 216 | 218 | 218 | 218 | 216 | 216 | 216 | 216 | 214 | 218 | 214 | 216 | 216 | 216 | 216 | 216 | 218 | 216 | 216 | 216 | 218 | 216 | 219 | 210-224 |

|         |     |     |     |     |     |     |     |     |     |     |     |     |     |     |     |     |     |     |     |     |     |     |     |     |         |
|---------|-----|-----|-----|-----|-----|-----|-----|-----|-----|-----|-----|-----|-----|-----|-----|-----|-----|-----|-----|-----|-----|-----|-----|-----|---------|
| D1S206  | 212 | 212 | 212 | 214 | 212 | 212 | 212 | 216 | 212 | 222 | 212 | 216 | 212 | 212 | 212 | 212 | 212 | 212 | 212 | 214 | 212 | 212 | 214 | 216 | 208-226 |
| D1S2726 | 286 | 284 | 286 | 286 | 284 | 284 | 284 | 284 | 286 | 284 | 286 | 284 | 284 | 284 | 284 | 288 | 284 | 288 | 284 | 284 | 284 | 296 | 286 | 284 | 284-296 |
| D1S252  | 96  | 100 | 96  | 92  | 96  | 100 | 92  | 96  | 92  | 92  | 92  | 92  | 100 | 104 | 100 | 106 | 104 | 106 | 92  | 104 | 104 | 104 | 92  | 102 | 90-115  |
| D1S498  | 200 | 198 | 200 | 202 | 200 | 198 | 202 | 202 | 202 | 202 | 202 | 202 | 202 | 200 | 200 | 202 | 200 | 202 | 202 | 202 | 202 | 198 | 200 | 200 | 190-212 |
| D1S484  | 287 | 278 | 278 | 278 | 278 | 278 | 278 | 282 | 278 | 282 | 278 | 282 | 278 | 280 | 278 | 280 | 278 | 280 | 278 | 280 | 278 | 280 | 278 | 282 | 276-290 |
| D1S2878 | 157 | 171 | 157 | 169 | 171 | 169 | 157 | 171 | 157 | 171 | 157 | 171 | 157 | 173 | 157 | 173 | 157 | 173 | 173 | 159 | 159 | 159 | 159 | 173 | 152-178 |
| D1S196  | 322 | 322 | 322 | 322 | 322 | 332 | 322 | 322 | 322 | 322 | 322 | 322 | 322 | 322 | 322 | 322 | 322 | 332 | 332 | 322 | 332 | 334 | 322 | 328 | 322-338 |
| D1S218  | 282 | 272 | 282 | 280 | 280 | 272 | 282 | 282 | 282 | 280 | 282 | 280 | 282 | 270 | 282 | 288 | 282 | 284 | 280 | 270 | 280 | 286 | 272 | 280 | 271-295 |
| D1S238  | 313 | 315 | 313 | 310 | 315 | 310 | 313 | 311 | 313 | 308 | 313 | 307 | 313 | 319 | 313 | 319 | 313 | 313 | 313 | 319 | 313 | 313 | 313 | 305 | 296-330 |
| D1S413  |     |     |     |     | 256 | 256 | 260 | 256 | 260 | 258 | 260 | 258 | 258 | 256 | 258 | 256 | 256 | 256 | 256 | 258 | 256 | 252 |     |     | 254-270 |
| D1S249  | 179 | 179 | 179 | 183 | 179 | 183 | 177 | 179 | 177 | 183 | 177 | 183 | 173 | 179 | 173 | 169 | 173 | 169 | 173 | 176 | 169 | 173 | 171 | 175 | 163-193 |
| D1S425  | 352 | 356 | 352 | 356 | 352 | 356 | 352 | 356 | 352 | 348 | 352 | 348 | 300 | 300 | 350 | 356 | 356 | 350 | 356 | 352 | 356 | 352 | 352 | 350 | 335-361 |
| D1S213  | 114 | 110 | 114 | 112 | 110 | 110 | 110 | 110 | 110 | 114 | 110 | 114 | 120 | 110 | 120 | 116 | 120 | 116 | 110 | 116 | 110 | 116 | 114 |     | 107-133 |
| D1S2800 | 211 | 217 | 211 | 217 | 211 | 211 | 211 | 211 | 211 | 211 | 211 | 211 | 213 | 211 | 213 | 217 | 213 | 217 | 219 | 211 | 219 | 215 | 213 | 215 | 210-224 |
| D1S2785 | 188 | 186 | 188 | 186 | 188 | 186 | 188 | 174 | 188 | 186 | 186 | 174 | 186 | 188 | 186 | 182 | 186 | 182 | 182 | 182 | 182 | 178 | 174 | 182 | 173-187 |
| D1S2842 | 345 | 351 | 345 | 351 | 345 | 351 | 345 | 351 | 345 | 351 | 345 | 345 | 345 | 351 | 345 | 351 | 345 | 351 | 345 | 345 | 345 | 351 | 345 | 347 | 337-359 |
| D1S2836 | 245 | 245 | 245 | 245 | 245 | 245 | 245 | 250 | 245 | 248 | 245 | 248 | 245 | 252 | 245 | 252 | 245 | 252 | 252 | 245 | 252 | 250 | 245 | 245 | 246-260 |

**Chromosome 2**

| Marker  | 5   |     | 20  |     | 18  |     | 1   |     | 12  |     | 11  |     | 7   |     | 21  |     | 24  |     | 8   |     | 25  |     | 26  |     | Size |         |
|---------|-----|-----|-----|-----|-----|-----|-----|-----|-----|-----|-----|-----|-----|-----|-----|-----|-----|-----|-----|-----|-----|-----|-----|-----|------|---------|
| D2S319  | 136 | 136 | 136 | 136 |     |     |     |     | 136 | 138 | 136 | 138 |     |     | 140 | 140 |     |     |     |     |     |     |     | 138 | 138  | 132-144 |
| D2S2211 | 249 | 249 | 249 | 251 | 249 | 251 | 251 | 249 | 251 | 259 | 251 | 259 | 253 | 255 | 253 | 249 | 255 | 257 | 253 | 255 | 251 | 255 | 249 | 253 |      | 241-261 |
| D2S162  | 125 | 139 | 125 | 125 |     |     |     |     | 135 | 141 | 135 | 141 |     |     | 147 | 147 |     |     |     |     |     |     |     | 133 | 143  | 124-152 |
| D2S168  | 164 | 180 | 164 | 176 |     |     |     |     | 164 | 164 | 164 | 164 |     |     | 182 | 162 |     |     |     |     |     |     |     | 164 | 162  | 159-183 |
| D2S305  | 326 | 328 | 326 | 328 | 326 | 326 | 328 | 332 | 322 | 322 | 322 | 322 | 324 | 324 | 324 | 324 | 324 | 326 | 328 | 324 | 328 | 326 | 324 | 324 |      | 316-338 |
| D2S165  | 146 | 164 | 146 | 164 | 164 | 164 | 158 | 146 | 156 | 158 | 156 | 158 | 162 | 146 | 162 | 158 | 146 | 160 | 146 | 162 | 146 | 168 | 146 | 166 |      | 145-177 |
| D2S367  | 328 | 333 | 328 | 333 | 328 | 333 | 331 | 328 | 331 | 333 | 331 | 333 | 328 | 326 | 328 | 326 | 328 | 314 | 326 | 328 | 326 | 331 | 328 | 322 |      | 309-341 |

|         |     |     |     |     |     |     |     |     |     |     |     |     |     |     |     |     |     |     |     |     |     |     |     |     |         |
|---------|-----|-----|-----|-----|-----|-----|-----|-----|-----|-----|-----|-----|-----|-----|-----|-----|-----|-----|-----|-----|-----|-----|-----|-----|---------|
| D2S2259 | 324 | 324 | 324 | 324 |     |     |     |     | 322 | 322 | 322 | 322 |     |     | 324 | 324 |     |     |     |     |     |     | 324 | 322 | 322-342 |
| D2S391  | 150 | 156 | 150 | 154 | 150 | 154 | 156 | 156 | 156 | 156 | 156 | 154 | 150 | 150 | 150 | 152 | 150 | 152 | 150 | 156 | 150 | 152 | 156 | 154 | 147-161 |
| D2S337  | 306 | 302 | 306 | 306 | 306 | 306 | 302 | 306 | 306 | 297 | 306 | 304 | 306 | 300 | 306 | 297 | 300 | 304 | 306 | 308 |     |     | 300 | 308 | 295-319 |
| D2S2368 | 94  | 96  | 94  | 112 | 94  | 112 | 94  | 96  | 96  | 112 | 94  | 108 | 96  | 94  | 96  | 100 | 96  | 98  | 94  | 118 | 94  | 112 | 110 | 118 | 97-121  |
| D2S286  | 93  | 101 | 93  | 101 | 93  | 101 | 93  | 101 | 93  | 93  | 93  | 105 | 89  | 99  | 89  | 97  | 99  | 97  | 89  | 89  | 89  | 89  | 89  | 97  | 85-107  |
| D2S2333 | 104 | 106 | 104 | 106 | 104 | 106 | 96  | 106 | 96  | 104 | 96  | 104 | 104 | 106 | 104 | 100 | 106 | 100 | 104 | 106 | 104 | 106 | 104 | 96  | 84-106  |
| D2S2216 | 221 | 223 | 221 | 211 |     |     |     |     | 213 | 215 | 213 | 215 |     |     | 221 | 215 |     |     |     |     |     |     | 221 | 223 | 213-227 |
| D2S160  | 217 | 217 | 217 | 217 | 217 | 217 | 209 | 217 | 209 | 215 | 217 | 215 | 215 | 221 | 215 | 213 | 221 | 213 | 217 | 215 | 217 | 215 | 217 | 213 | 210-228 |
| D2S347  | 272 | 294 | 272 | 296 |     |     |     |     | 272 | 292 | 272 | 272 |     |     | 272 | 292 |     |     |     |     |     |     | 274 | 292 | 271-301 |
| D2S112  | 87  | 81  | 87  | 81  |     |     |     |     | 87  | 77  | 87  | 77  |     |     | 89  | 91  |     |     |     |     |     |     | 83  | 89  | 79-95   |
| D2S151  | 250 | 244 | 250 | 250 | 250 | 250 | 250 | 245 | 250 | 256 |     |     | 248 | 246 | 250 | 248 | 250 | 248 | 244 | 256 | 244 | 250 | 244 | 252 | 228-256 |
| D2S142  | 246 | 242 | 246 | 237 | 246 | 237 | 246 | 242 | 246 | 237 | 242 | 237 | 246 | 237 | 246 | 244 | 246 | 244 | 246 | 237 | 246 | 246 | 246 | 237 | 239-259 |
| D2S2330 | 172 | 174 | 172 | 174 |     |     |     |     | 180 | 174 | 172 | 178 |     |     | 180 | 178 |     |     |     |     |     |     | 172 | 178 | 171-189 |
| D2S335  | 206 | 200 | 206 | 202 | 200 | 202 | 206 | 200 | 206 | 200 | 206 | 196 | 182 | 200 | 182 | 206 | 182 | 206 | 182 | 200 | 182 | 182 | 200 | 182 | 189-209 |
| D2S364  | 242 | 242 | 242 | 242 | 242 | 242 | 242 | 254 | 242 | 242 | 242 | 254 | 242 | 242 | 242 | 242 | 242 | 238 | 252 | 242 | 252 | 254 | 242 | 254 | 234-260 |
| D2S117  | 210 | 199 | 208 | 199 | 210 | 208 | 210 | 208 | 210 | 210 | 208 | 199 | 210 | 210 | 210 | 203 | 210 | 210 | 212 | 210 | 212 | 208 | 210 | 207 | 193-221 |
| D2S325  | 183 | 161 | 183 | 171 | 161 | 169 | 161 | 183 | 161 | 171 | 161 | 161 | 171 | 171 | 171 | 169 | 171 | 169 | 171 | 169 | 171 | 169 | 171 | 169 | 158-186 |
| D2S2382 | 322 | 298 | 322 | 318 | 298 | 308 | 322 | 298 | 298 | 318 | 298 | 322 | 298 | 318 | 298 | 318 | 298 | 318 | 308 | 318 | 308 | 318 | 324 | 324 | 299-337 |
| D2S126  | 139 | 141 | 139 | 129 | 141 | 143 | 139 | 141 | 139 | 141 | 141 | 141 | 139 | 139 | 139 | 133 | 139 | 133 | 139 | 139 | 139 | 143 | 139 | 129 | 119-149 |
| D2S396  | 247 | 237 | 247 | 243 | 237 | 245 | 247 | 237 | 247 | 237 | 239 | 237 | 241 | 247 | 241 | 243 | 241 | 243 | 241 | 247 | 241 | 247 | 241 | 241 | 236-254 |
| D2S206  | 145 | 155 | 145 |     | 155 | 155 | 145 | 155 |     |     |     |     | 151 | 153 | 151 | 153 | 151 | 153 | 147 | 153 | 147 | 147 | 153 | 155 | 130-166 |
| D2S338  | 287 | 279 | 287 | 275 | 287 | 275 | 279 | 287 | 295 | 279 | 295 | 287 | 295 | 293 | 295 | 293 | 295 | 293 | 279 | 293 | 279 | 283 | 285 | 293 | 270-294 |
| D2S125  | 94  | 94  | 94  | 99  | 94  | 99  | 94  | 94  | 94  | 105 | 94  | 99  | 105 | 96  | 105 | 99  | 105 | 96  | 105 | 96  | 101 | 96  | 105 | 105 | 92-112  |

**Chromosome 3**

| Marker  | 5   |     | 20  |     | 18  |     | 1   |     | 12  |     | 11  |     | 7   |     | 21  |     | 24  |     | 8   |     | 25  |     | 26  |     | Size    |
|---------|-----|-----|-----|-----|-----|-----|-----|-----|-----|-----|-----|-----|-----|-----|-----|-----|-----|-----|-----|-----|-----|-----|-----|-----|---------|
| D3S1297 | 365 | 353 | 365 | 359 | 365 | 353 | 355 | 353 | 355 | 361 | 355 | 361 | 355 | 365 | 355 | 363 | 365 | 357 | 363 | 365 | 363 | 359 | 364 | 362 | 352-370 |



|         |     |     |     |     |     |     |     |     |     |     |     |     |     |     |     |     |     |     |     |     |     |     |     |     |         |         |
|---------|-----|-----|-----|-----|-----|-----|-----|-----|-----|-----|-----|-----|-----|-----|-----|-----|-----|-----|-----|-----|-----|-----|-----|-----|---------|---------|
| D4S403  | 184 | 190 | 184 | 184 | 184 | 190 | 184 | 188 | 184 | 186 | 188 | 186 | 184 | 184 | 184 | 186 | 184 | 186 | 184 | 184 | 184 | 186 | 184 | 184 | 173-189 |         |
| D4S419  | 229 | 233 | 229 | 239 |     |     | 233 | 233 | 233 | 241 | 233 | 241 | 233 | 229 | 233 | 229 | 233 | 229 | 233 | 229 | 233 | 241 | 233 | 241 | 229-249 |         |
| D4S391  | 161 | 159 | 161 | 163 | 159 | 163 | 159 | 175 | 159 | 163 | 175 | 163 | 165 | 161 | 165 | 167 | 165 | 170 | 165 | 161 |     |     | 165 | 161 | 153-173 |         |
| D4S 405 | 301 | 286 | 301 | 298 | 286 | 296 | 286 | 296 | 298 | 286 | 298 | 296 | 298 | 296 | 298 | 300 | 298 | 300 | 296 | 294 | 296 | 300 | 298 | 298 | 284-312 |         |
| D4S1592 | 132 | 137 | 132 | 135 | 132 | 132 | 132 | 132 | 132 | 135 | 132 | 135 | 130 | 137 | 130 | 132 | 130 | 132 | 132 | 132 | 132 | 132 | 130 | 137 | 117-145 |         |
| D4S392  |     |     | 102 | 98  | 102 | 100 | 106 | 100 | 106 | 100 | 106 | 100 | 106 | 104 | 106 | 98  | 106 | 98  | 104 | 100 | 100 | 104 | 104 | 100 | 84-114  |         |
| D4S2964 | 138 | 130 | 138 | 144 | 130 | 130 | 126 | 130 | 126 | 144 | 126 | 144 |     |     | 126 | 144 |     |     | 132 | 132 | 132 | 130 | 126 | 142 | 124-148 |         |
| D4S1534 | 162 | 154 | 162 | 162 | 162 | 154 | 158 | 154 | 158 | 162 | 158 | 162 | 160 | 154 | 160 | 162 | 160 | 162 | 160 | 154 | 160 | 154 | 162 | 154 | 152-172 |         |
| D4S 414 |     |     | 242 | 247 | 242 | 242 | 242 | 242 | 242 | 244 | 242 | 242 | 240 | 246 | 240 | 242 | 240 | 246 | 242 | 246 | 240 | 246 | 240 | 244 | 235-253 |         |
| D4S1572 | 203 | 209 | 203 | 197 | 209 | 197 | 203 | 209 | 203 | 209 | 203 | 209 | 203 | 211 | 203 | 209 | 203 | 209 | 211 | 197 | 211 | 203 | 203 | 211 | 199-217 |         |
| D4S406  |     |     | 260 | 256 | 260 | 264 | 264 | 264 | 264 | 246 | 264 | 246 | 264 | 254 | 264 | 254 | 264 | 254 | 262 | 252 | 262 | 254 | 264 | 260 | 246-272 |         |
| D4S402  | 122 | 126 | 122 | 134 |     |     | 122 | 126 | 122 | 144 | 122 | 144 |     |     | 122 | 144 |     |     |     |     |     |     |     | 130 | 134     | 112-152 |
| D4S1575 |     |     | 302 | 298 | 302 | 298 | 300 | 302 | 300 | 300 | 302 | 302 | 300 | 298 | 300 | 300 | 300 | 300 | 302 | 298 | 298 | 298 | 302 | 302 | 292-310 |         |
| D4S424  | 200 | 208 | 200 | 202 | 200 | 202 | 200 | 208 | 200 | 205 | 208 | 208 | 208 | 204 | 208 | 200 | 208 | 210 | 204 | 200 | 204 | 202 | 200 | 204 | 197-215 |         |
| D4S413  | 296 | 319 | 296 | 288 | 296 | 288 | 296 | 319 | 313 | 319 | 296 | 315 | 290 | 315 | 290 | 288 | 290 | 299 | 290 | 313 | 290 | 322 | 290 | 315 | 286-338 |         |
| D4S1597 |     |     | 292 | 292 | 298 | 302 | 288 | 300 |     |     | 288 | 282 | 298 | 300 |     |     | 288 | 300 | 288 | 302 | 288 | 298 | 300 | 302 | 278-304 |         |
| D4S1539 | 321 | 319 | 321 | 319 |     |     |     |     | 321 | 319 | 321 | 319 |     |     | 321 | 319 |     |     |     |     |     |     |     | 321 | 327     | 319-327 |
| D4S 415 | 270 | 270 | 270 | 270 | 270 | 270 | 270 | 270 | 270 | 270 | 270 | 270 | 270 | 272 | 270 | 272 | 270 | 272 | 272 | 272 | 272 | 272 | 270 | 270 | 270     | 268-304 |
| D4S1535 | 265 | 263 | 265 | 260 | 263 | 260 | 265 | 267 | 265 | 267 | 265 | 258 | 263 | 260 | 263 | 258 | 263 | 258 | 263 | 260 | 263 | 265 | 263 | 265 | 254-268 |         |
| D4S426  | 165 | 167 | 165 | 163 | 165 | 165 | 167 | 165 | 167 | 167 | 165 | 175 | 167 | 167 | 167 | 165 | 167 | 175 | 167 | 167 | 167 | 167 | 167 | 173 | 163-183 |         |

**Chromosome 5**

| Marker  | 5   |     | 20  |     | 18  |     | 1   |     | 12  |     | 11  |     | 7   |     | 21  |     | 24  |     | 8   |     | 25  |     | 26  |     | Size    |         |
|---------|-----|-----|-----|-----|-----|-----|-----|-----|-----|-----|-----|-----|-----|-----|-----|-----|-----|-----|-----|-----|-----|-----|-----|-----|---------|---------|
| D5S1981 | 129 | 129 | 129 | 127 | 129 | 129 | 129 | 125 | 129 | 125 | 129 | 125 | 125 | 125 | 129 | 125 | 127 | 125 | 127 | 125 | 129 | 127 | 127 | 127 | 121-131 |         |
| D5S406  | 186 | 188 | 186 | 188 | 186 | 188 | 186 | 186 | 186 | 174 | 186 | 174 | 186 | 174 | 186 | 184 | 174 | 174 | 184 | 184 | 184 | 166 | 186 | 184 | 168-196 |         |
| D5S630  | 314 | 314 | 314 | 314 |     |     | 306 | 306 | 306 | 314 | 306 | 314 |     |     | 289 | 306 |     |     |     |     |     |     |     | 293 | 289     | 287-395 |
| D5S416  | 292 | 290 | 292 | 290 | 292 | 290 | 298 | 296 | 298 | 292 | 296 | 292 | 296 | 288 | 296 | 296 | 296 | 288 | 296 | 289 | 296 | 292 | 294 | 296 | 289-301 |         |

|         |     |     |     |     |     |     |     |     |     |     |     |     |     |     |     |     |     |     |     |     |     |     |     |     |         |
|---------|-----|-----|-----|-----|-----|-----|-----|-----|-----|-----|-----|-----|-----|-----|-----|-----|-----|-----|-----|-----|-----|-----|-----|-----|---------|
| D5S419  | 274 | 261 | 274 | 274 | 274 | 274 | 282 | 267 | 282 | 270 | 270 | 267 | 274 | 265 | 274 | 280 | 265 | 280 | 267 | 274 | 267 | 276 | 274 | 278 | 258-290 |
| D5S426  | 297 | 289 | 297 | 299 | 297 | 299 | 301 | 289 | 301 | 289 | 301 | 289 | 289 | 297 | 289 | 295 | 289 | 295 | 289 | 297 | 289 | 295 | 289 | 293 | 279-303 |
| D5S418  | 223 | 213 | 223 | 213 | 223 | 213 | 213 | 223 | 213 | 213 | 213 | 213 | 219 | 223 | 221 | 219 | 219 | 221 | 221 | 213 | 221 | 217 | 223 | 220 | 212-232 |
| D5S407  | 105 | 89  | 105 | 89  | 105 | 89  | 99  | 103 | 99  | 103 | 99  | 103 | 99  | 89  | 99  | 89  | 99  | 89  | 91  | 101 | 91  | 105 | 99  | 95  | 87-115  |
| D5S647  | 346 | 346 | 346 | 346 | 346 | 346 | 344 | 342 | 344 | 340 | 344 | 338 | 359 | 346 | 359 | 344 | 346 | 344 | 346 | 344 | 346 | 348 | 346 | 359 | 328-368 |
| D5S424  | 221 | 216 | 221 | 221 | 221 | 212 | 216 | 216 | 216 | 221 | 216 | 216 | 221 | 216 | 221 | 216 | 221 | 212 | 228 | 221 | 228 | 218 | 216 | 216 | 215-237 |
| D5S462  | 115 | 117 | 115 | 115 | 115 | 117 |     |     | 117 | 117 | 119 | 117 | 115 | 115 | 115 | 117 | 115 | 117 | 115 | 117 | 115 | 113 | 115 | 117 | 108-124 |
| D5S641  | 321 | 301 | 321 | 307 | 321 | 307 | 321 | 301 | 321 | 311 | 301 | 319 | 319 | 317 | 319 | 317 | 319 | 319 | 301 | 321 | 301 | 315 | 317 | 317 | 301-341 |
| D5S428  | 248 | 248 | 248 | 244 | 248 | 244 | 248 | 248 | 248 | 244 | 248 | 250 | 250 | 254 | 250 | 254 | 250 | 248 | 244 | 248 | 244 | 254 | 248 | 254 | 248-266 |
| D5S644  | 96  | 89  | 96  | 100 | 96  | 100 | 96  | 98  | 96  | 96  | 98  | 88  | 104 | 102 | 104 | 88  | 104 | 94  | 100 | 96  | 100 | 100 | 100 | 100 | 86-116  |
| D5S433  | 89  | 91  | 89  | 83  | 89  | 83  | 80  | 91  | 80  | 93  | 80  | 91  | 95  | 78  | 95  | 89  | 78  | 80  | 92  | 88  | 92  | 80  | 89  | 93  | 69-99   |
| D5S2027 | 200 | 202 | 200 | 180 | 200 | 180 | 202 | 198 |     |     | 202 | 196 | 198 | 202 | 198 | 196 | 202 | 180 | 202 | 200 | 202 | 180 | 202 | 202 | 184-206 |
| D5S471  | 245 | 245 | 245 | 245 | 245 | 255 | 245 | 245 | 245 | 251 | 245 | 245 | 245 | 254 | 245 | 254 | 245 | 254 | 245 | 254 | 245 | 255 | 245 | 250 | 241-261 |
| D5S2115 | 172 | 160 | 172 | 172 | 172 | 172 | 176 | 160 | 176 | 160 | 172 | 160 | 174 | 176 | 174 | 174 | 174 | 174 | 174 | 172 | 174 | 172 | 174 | 172 | 146-172 |
| D5S436  | 236 | 244 | 236 | 242 | 236 | 242 | 244 | 242 | 244 | 262 | 244 | 248 | 248 | 242 | 248 | 242 | 248 | 242 | 248 | 236 | 248 | 252 | 248 | 254 | 242-262 |
| D5S410  | 339 | 334 | 339 | 339 | 339 | 334 | 334 | 334 | 344 | 346 | 344 | 351 | 351 | 336 | 351 | 336 | 351 | 336 | 339 | 351 | 339 | 336 | 339 | 351 | 332-354 |
| D5S422  | 126 | 132 | 126 | 126 | 126 | 132 | 120 | 126 | 120 | 132 | 120 | 126 | 126 | 126 | 126 | 126 | 126 | 135 | 126 | 126 | 126 | 135 | 126 | 138 | 118-140 |
| D5S400  | 233 | 233 | 233 | 229 | 233 | 229 | 233 | 231 | 231 | 223 | 233 | 233 | 233 | 233 | 233 | 233 | 231 | 233 | 317 | 233 | 233 | 233 | 233 | 239 | 221-243 |
| D5S408  | 265 | 269 | 265 | 263 | 265 | 263 | 265 | 269 | 265 | 255 | 269 | 265 | 269 | 255 | 255 | 265 | 269 | 265 | 263 | 255 | 263 | 265 | 263 | 255 | 253-289 |

**Chromosome 6**

| Marker  | 5   | 20  | 18  | 1   | 12  | 11  | 7   | 21  | 24  | 8   | 25  | 26  | Size |     |     |     |     |     |     |     |     |     |     |         |         |
|---------|-----|-----|-----|-----|-----|-----|-----|-----|-----|-----|-----|-----|------|-----|-----|-----|-----|-----|-----|-----|-----|-----|-----|---------|---------|
| D6S1574 | 157 | 157 | 157 | 160 | 157 | 160 | 157 | 157 | 157 | 164 | 157 | 168 | 168  | 168 | 168 | 168 | 157 | 166 | 170 | 166 | 162 | 170 | 168 | 150-176 |         |
| D6S309  | 325 | 325 | 325 | 315 | 325 | 315 | 325 | 325 | 325 | 317 | 325 | 310 | 310  | 325 | 310 | 319 | 325 | 319 | 313 | 321 | 313 | 313 |     |         | 307-333 |
| D6S470  | 141 | 139 | 141 | 135 | 139 | 127 | 139 | 141 | 139 | 137 | 141 | 129 | 129  | 133 | 129 | 135 | 133 | 135 | 135 | 133 | 135 | 135 | 133 | 137     | 125-145 |
| D6S289  | 167 | 175 | 167 | 175 | 175 | 175 | 167 | 169 | 167 | 169 | 167 | 169 | 169  | 177 | 169 | 175 | 177 | 175 | 177 | 175 | 177 | 175 | 177 | 175     | 163-185 |
| D6S422  | 298 | 304 | 298 | 319 | 304 | 308 | 316 | 298 | 316 | 302 | 298 | 308 | 316  | 310 | 316 | 302 | 310 | 302 | 310 | 314 | 310 | 314 | 306 | 316     | 300-322 |

|         |     |     |     |     |     |     |     |     |     |     |     |     |     |     |     |     |     |     |     |     |     |     |     |         |         |
|---------|-----|-----|-----|-----|-----|-----|-----|-----|-----|-----|-----|-----|-----|-----|-----|-----|-----|-----|-----|-----|-----|-----|-----|---------|---------|
| D6S276  | 223 | 227 | 223 | 227 | 227 | 211 | 223 | 203 | 203 | 203 | 223 | 229 | 203 | 211 | 203 | 217 | 203 | 217 | 227 | 211 | 227 | 219 | 219 | 205-237 |         |
| D6S1610 | 212 | 204 | 212 | 204 | 212 | 212 | 212 | 205 | 212 | 210 | 205 | 208 | 212 | 212 | 212 | 212 | 212 | 212 | 212 | 212 | 212 | 210 | 212 | 210     | 204-218 |
| D6S257  | 186 | 184 | 186 | 170 | 186 | 170 | 184 | 178 | 184 | 184 | 184 | 184 | 178 | 180 | 178 | 190 | 178 | 190 | 178 | 184 | 178 | 180 | 186 | 184     | 170-198 |
| D6S460  | 291 | 293 | 291 | 282 | 293 | 282 | 293 | 289 | 293 | 282 | 293 | 282 | 289 | 289 | 289 | 291 | 289 | 291 | 281 | 289 | 281 | 289 | 281 | 287     | 283-307 |
| D6S434  | 212 | 212 | 212 | 227 | 212 | 227 | 212 | 212 | 212 | 210 | 212 | 208 | 212 | 208 | 212 | 208 | 212 | 212 |     |     | 208 | 208 | 212 | 212     | 206-250 |
| D6S287  | 127 | 133 | 127 | 129 | 133 | 129 | 133 | 129 | 133 | 137 | 129 | 139 | 135 | 129 | 135 | 137 | 129 | 137 | 135 | 129 | 135 | 135 | 131 | 135     | 110-144 |
| D6S262  | 175 | 185 | 175 | 187 | 185 | 187 | 185 | 173 | 185 | 177 | 173 | 177 | 185 | 173 | 185 | 175 | 173 | 175 | 185 | 173 | 185 | 179 | 185 | 173     | 171-191 |
| D6S292  | 162 | 157 | 162 | 162 | 162 | 154 | 162 | 162 | 162 | 160 | 162 | 154 | 166 | 162 | 166 | 168 | 166 | 162 | 166 | 162 | 166 | 166 | 166 | 166     | 158-180 |
| D6S303  | 342 | 346 | 342 | 344 | 342 | 344 | 344 | 346 | 344 | 338 | 344 | 346 | 338 | 346 | 338 | 342 | 346 | 342 | 346 | 342 | 346 | 342 | 342 | 344     | 328-356 |
| D6S441  | 174 | 182 |     |     | 174 | 186 | 186 | 186 | 186 | 192 | 186 | 188 | 186 | 174 | 186 | 174 | 186 | 188 | 190 | 186 | 190 | 184 | 174 | 188     | 166-200 |
| D6S1581 | 265 | 263 | 265 | 263 | 265 | 263 | 265 | 274 | 265 | 274 | 265 | 274 | 265 | 274 | 270 | 274 | 274 | 274 | 265 | 274 | 265 | 265 | 267 | 270     | 261-275 |
| D6S264  | 119 | 117 | 119 | 119 | 119 | 119 | 119 | 119 | 119 | 117 | 119 | 117 | 117 | 132 | 117 | 119 | 117 | 113 | 117 | 132 | 117 | 119 | 119 | 113     | 113-135 |
| D6S 446 | 228 | 222 | 228 | 220 | 222 | 222 | 230 | 228 | 230 | 222 | 228 | 222 | 222 | 226 | 222 | 228 | 226 | 224 | 222 | 226 | 222 | 220 | 220 | 222     | 222-234 |
| D6S281  | 140 | 140 | 140 | 140 | 140 | 144 | 144 | 140 | 144 | 146 | 140 | 140 | 140 | 146 | 140 | 152 |     |     | 140 | 146 | 140 | 144 | 142 | 144     | 136-156 |

## Chromosome 7

| Marker  | 5   |     | 20  |     | 18  |     | 1   |     | 12  |     | 11  |     | 7   |     | 21  |     | 24  |     | 8   |     | 25  |     | 26  |     | Size    |
|---------|-----|-----|-----|-----|-----|-----|-----|-----|-----|-----|-----|-----|-----|-----|-----|-----|-----|-----|-----|-----|-----|-----|-----|-----|---------|
| D7S531  | 290 | 292 | 284 | 290 | 290 | 286 | 292 | 290 | 292 | 284 | 290 | 284 | 284 | 290 | 284 | 296 | 290 | 292 | 292 | 290 | 292 | 292 | 284 | 284 | 281-299 |
| D7S 517 | 246 | 261 | 246 | 249 | 261 | 265 | 251 | 251 | 255 | 251 | 255 | 251 | 251 | 261 | 251 | 251 | 261 | 263 | 251 | 255 | 251 | 263 | 257 | 251 | 247-265 |
| D7S513  | 192 | 188 | 192 | 188 | 192 | 194 | 194 | 188 | 194 | 202 | 188 | 202 | 194 | 192 | 194 | 202 | 192 | 190 | 194 | 194 | 194 | 194 | 194 | 194 | 172-202 |
| D7S507  | 91  | 93  | 91  | 98  | 93  | 102 | 89  | 91  | 89  | 105 | 91  | 105 | 105 | 93  | 105 | 98  | 93  | 98  | 93  | 98  | 93  | 102 | 98  | 98  | 86-114  |
| D7S493  | 237 | 231 | 237 | 215 | 231 | 229 | 237 | 229 | 237 | 239 | 237 | 239 | 239 | 231 | 239 | 233 | 231 | 237 | 231 | 237 | 231 | 229 | 237 | 215 | 207-239 |
| D7S516  | 322 | 316 | 322 | 320 | 316 | 326 | 322 | 316 | 322 | 322 | 322 | 322 | 320 | 316 | 320 | 320 | 320 | 316 | 320 | 316 | 320 | 316 | 320 | 320 | 308-328 |
| D7S484  | 110 | 110 | 110 | 112 | 110 | 114 | 110 | 118 | 110 | 112 | 110 | 112 | 112 | 110 | 112 | 112 | 112 | 110 | 110 | 112 | 110 | 110 | 110 | 108 | 102-120 |
| D7S510  | 89  | 91  | 89  | 97  | 91  | 91  | 89  | 95  | 89  | 97  | 89  | 97  | 93  | 89  | 93  | 95  | 93  | 95  | 93  | 89  | 93  | 89  | 91  | 91  | 85-101  |
| D7S519  | 272 | 268 | 272 | 274 | 268 | 274 | 262 | 268 | 262 | 270 | 262 | 270 | 262 | 272 | 262 | 268 | 262 | 268 | 272 | 262 | 272 | 272 | 266 | 268 | 260-288 |
| D7S502  | 305 | 299 | 305 | 297 | 305 | 297 | 305 | 303 | 305 | 295 | 305 | 295 | 301 | 299 | 301 | 307 | 301 | 307 | 299 | 315 | 299 | 295 | 301 | 301 | 291-311 |

|         |     |     |     |     |     |     |     |     |     |     |     |     |     |     |     |     |     |     |     |     |     |     |     |     |         |
|---------|-----|-----|-----|-----|-----|-----|-----|-----|-----|-----|-----|-----|-----|-----|-----|-----|-----|-----|-----|-----|-----|-----|-----|-----|---------|
| D7S669  | 188 | 190 | 188 | 184 | 190 | 184 | 178 | 190 | 178 | 184 | 190 | 184 | 188 | 188 | 188 | 182 | 188 | 182 | 188 | 188 | 188 | 184 | 188 | 186 | 176-198 |
| D7S630  | 339 | 352 | 339 | 354 | 352 | 333 | 339 | 352 | 339 | 352 | 352 | 352 | 341 | 337 | 341 | 341 | 341 | 341 | 341 | 337 | 341 | 337 | 341 | 337 | 328-356 |
| D7S657  | 272 | 268 | 272 | 260 | 272 | 268 | 268 | 268 | 268 | 256 | 268 | 256 | 266 | 268 | 266 | 266 | 266 | 266 | 268 | 266 | 268 | 256 | 256 | 266 | 248-274 |
| D7S515  | 176 | 165 | 177 | 141 | 176 | 167 | 141 | 167 | 141 | 165 | 167 | 171 | 141 | 173 | 173 | 141 | 141 | 165 | 175 | 141 | 175 | 167 | 165 | 141 | 144-206 |
| D7S486  | 234 | 234 | 234 | 227 | 234 | 234 | 234 | 234 | 234 | 234 | 234 | 234 | 234 | 234 | 234 | 227 | 234 | 227 | 234 | 234 | 234 | 234 | 234 | 227 | 226-240 |
| D7S530  | 112 | 119 | 112 | 117 | 119 | 115 | 112 | 114 | 112 | 117 | 112 | 114 | 112 | 121 | 112 | 117 | 112 | 117 | 119 | 112 | 119 | 110 | 112 | 112 | 109-127 |
| D7S640  | 124 | 134 | 124 | 118 | 134 | 136 | 122 | 143 | 122 | 126 | 134 | 126 | 132 | 134 | 132 | 130 | 132 | 130 | 134 | 132 | 134 | 128 | 122 | 122 | 115-155 |
| D7S684  | 348 | 354 | 348 | 356 | 354 | 356 | 358 | 358 | 358 | 346 | 358 | 346 | 354 | 356 | 354 | 356 | 354 | 356 | 354 | 356 | 354 | 346 | 346 | 356 | 344-366 |
| D7S661  | 315 | 319 | 315 | 330 | 319 | 326 | 315 | 328 | 315 | 319 | 315 | 319 | 319 | 328 | 319 | 322 | 328 | 322 | 319 | 328 | 319 | 322 | 322 | 319 | 307-339 |
| D7S636  | 157 | 157 | 157 | 146 | 157 | 159 | 163 | 157 | 163 | 146 | 163 | 146 | 157 | 157 | 157 | 161 | 157 |     | 157 | 157 | 157 | 169 | 152 | 159 | 141-177 |
| D7S798  | 90  |     | 90  | 86  | 90  | 80  | 84  | 82  | 84  | 90  | 84  | 90  | 82  | 82  | 82  | 92  | 82  | 90  | 82  | 82  | 82  | 76  |     | 88  | 76-98   |
| D7S2465 | 331 | 340 | 331 | 330 | 331 | 330 | 332 | 331 | 332 | 334 | 332 | 334 | 325 | 332 | 325 | 334 | 332 | 332 | 333 | 332 | 333 | 335 | 332 | 332 | 321-345 |

**Chromosome 8**

| Marker  | 5   | 20  | 18  | 1   | 12  | 11  | 7   | 21  | 24  | 8   | 25  | 26  | Size |     |     |     |     |     |     |     |     |     |     |         |         |         |
|---------|-----|-----|-----|-----|-----|-----|-----|-----|-----|-----|-----|-----|------|-----|-----|-----|-----|-----|-----|-----|-----|-----|-----|---------|---------|---------|
| D8S264  | 148 | 152 | 156 | 152 | 148 | 156 | 148 | 152 | 148 | 146 | 148 | 146 | 148  | 148 | 148 | 148 | 148 | 148 | 148 | 148 | 146 | 148 | 160 | 140-164 |         |         |
| D8S277  | 173 | 167 | 167 | 165 | 173 | 165 | 178 | 167 | 178 | 165 | 178 | 165 | 178  | 165 | 178 | 178 | 165 | 165 | 184 | 174 | 184 | 165 | 184 | 165     | 154-188 |         |
| D8S550  | 216 | 213 | 195 | 216 | 123 | 195 | 211 | 217 | 211 | 207 | 211 | 207 | 211  | 215 | 211 | 213 | 215 | 195 | 213 | 211 | 213 | 215 | 211 | 213     | 191-122 |         |
| D8S549  | 84  | 82  | 84  | 80  | 82  | 80  | 82  | 84  | 82  | 80  | 82  | 80  | 82   | 84  | 82  | 80  | 82  | 84  | 80  | 82  | 80  | 80  | 80  | 82      | 78-88   |         |
| D8S258  | 158 | 156 | 158 | 158 | 156 | 156 | 156 | 152 | 156 | 156 | 152 | 156 | 158  | 156 | 158 | 158 | 158 | 156 | 158 | 156 | 158 | 146 | 154 | 156     | 146-160 |         |
| D8S1771 | 355 | 351 | 355 | 351 | 355 | 355 | 355 | 355 | 355 | 355 | 353 | 355 | 359  | 351 | 353 | 351 | 353 | 351 | 367 | 353 | 353 | 353 | 353 | 359     | 353     | 345-369 |
| D8S505  | 118 | 120 | 118 | 124 | 120 | 124 | 120 | 120 | 120 | 120 | 120 | 118 | 120  | 116 | 120 | 120 | 120 | 118 | 120 | 116 | 120 | 116 | 116 | 124     | 114-128 |         |
| D8S285  | 327 | 329 | 327 | 329 | 327 | 327 | 327 | 323 | 327 | 327 | 327 | 323 | 327  | 327 | 327 | 327 | 327 | 327 | 327 | 325 | 327 | 327 | 327 | 327     | 317-333 |         |
| D8S260  | 211 | 205 | 209 | 205 | 211 | 209 | 211 | 205 | 211 | 207 | 211 | 205 | 205  | 213 | 205 | 200 | 205 | 205 | 213 | 209 | 213 | 199 | 213 | 213     | 195-221 |         |
| D8S270  | 120 | 113 | 120 | 116 | 120 | 116 | 120 | 108 | 120 | 116 | 120 | 113 | 113  | 116 | 113 | 113 | 113 | 116 | 113 | 113 | 113 | 106 | 116 | 113     | 107-123 |         |
| D8S1784 | 286 | 284 | 286 | 290 | 286 | 290 | 286 | 284 | 286 | 290 | 286 | 288 | 284  | 288 | 284 | 288 | 288 | 290 | 290 | 288 | 290 | 290 | 290 | 290     | 280-298 |         |
| D8S514  | 224 | 226 | 224 | 224 | 224 | 224 | 224 | 226 | 224 | 228 | 224 | 226 | 218  | 224 | 218 | 222 | 218 | 224 | 224 | 218 | 224 | 224 | 224 | 222     | 216-236 |         |



|        |     |     |     |     |     |     |     |     |     |     |     |     |     |     |     |     |     |     |     |     |     |     |     |     |         |
|--------|-----|-----|-----|-----|-----|-----|-----|-----|-----|-----|-----|-----|-----|-----|-----|-----|-----|-----|-----|-----|-----|-----|-----|-----|---------|
| D8S284 | 303 | 286 | 303 | 297 | 286 | 297 | 303 | 286 | 303 | 295 | 303 | 288 | 303 | 288 | 303 | 288 | 303 | 307 | 303 | 288 | 303 | 303 | 299 | 288 | 275-309 |
| D8S272 | 249 | 251 | 249 | 255 | 251 | 255 | 249 | 251 | 249 | 255 | 249 | 261 | 249 | 245 | 249 | 249 | 249 | 249 | 249 | 245 | 249 | 259 | 246 | 255 | 215-265 |

### Chromosome 9

| Marker  | 5   |     | 20  |     | 18  |     | 1   |     | 12  |     | 11  |     | 7   |     | 21  |     | 24  |     | 8   |     | 25  |     | 26  |     | Size    |
|---------|-----|-----|-----|-----|-----|-----|-----|-----|-----|-----|-----|-----|-----|-----|-----|-----|-----|-----|-----|-----|-----|-----|-----|-----|---------|
| D9S288  | 139 | 147 | 139 | 143 | 147 | 143 | 147 | 139 | 147 | 147 | 147 | 149 | 147 | 147 | 147 | 140 | 147 | 139 | 147 | 147 | 147 | 149 | 147 | 142 | 138-158 |
| D9S286  |     |     | 159 | 167 | 159 | 161 | 163 |     | 163 | 145 | 163 | 151 | 159 | 151 | 159 | 145 | 159 | 145 | 151 | 159 | 151 | 167 | 161 | 151 | 139-173 |
| D9S285  | 109 | 101 | 109 | 109 | 101 | 109 | 109 | 101 | 109 | 101 | 109 | 101 | 109 | 109 | 109 | 109 | 109 | 109 | 101 | 109 | 101 | 109 | 109 | 109 | 85-113  |
| D9S157  | 241 | 243 | 241 | 229 | 241 | 233 | 241 | 243 | 241 | 231 | 241 | 231 | 241 | 229 | 241 | 231 | 241 | 231 | 241 | 241 | 241 | 241 | 229 | 229 | 229-253 |
| D9S171  | 173 | 173 | 173 | 173 | 173 | 173 | 173 | 173 | 173 | 179 | 173 | 179 | 173 | 173 | 173 | 165 | 173 | 165 | 173 | 173 | 173 | 173 | 173 | 181 | 164-188 |
| D9S161  | 127 | 138 | 127 | 127 | 127 | 127 | 127 | 138 | 127 | 138 | 127 | 127 | 127 | 138 | 127 | 129 | 127 | 129 | 127 | 127 | 127 | 136 | 127 | 138 | 126-144 |
| D9S1817 | 282 | 306 | 282 | 306 | 282 | 306 | 306 | 282 | 306 | 296 | 282 | 296 | 298 | 284 | 298 | 311 | 298 | 311 | 308 | 282 | 308 | 282 | 284 | 304 | 283-317 |
| D9S273  |     |     | 214 | 216 | 220 | 216 | 218 | 216 | 218 | 212 | 216 | 212 | 210 | 220 | 210 | 212 | 220 | 212 | 222 | 216 | 222 | 212 | 212 | 210 | 206-226 |
| D9S175  | 264 | 264 | 264 | 264 | 264 | 264 | 264 | 264 | 264 | 264 | 264 | 264 | 264 | 264 | 264 | 282 | 264 | 282 | 278 | 264 | 278 | 280 | 264 | 282 | 259-291 |
| D9S167  | 319 | 319 | 319 | 325 | 319 | 317 | 319 | 325 | 319 | 325 | 319 | 325 | 321 | 323 | 321 | 325 | 323 | 325 | 321 | 319 | 321 | 317 | 319 | 323 | 307-341 |
| D9S283  | 100 | 110 | 100 | 98  | 100 | 100 | 100 | 110 |     |     | 100 | 118 | 100 | 100 | 100 | 98  | 100 | 98  | 100 | 98  | 100 | 98  | 110 | 98  | 94-120  |
| D9S287  | 302 | 304 | 302 | 306 | 302 | 306 | 302 | 304 | 304 | 311 | 302 | 313 | 311 | 306 | 311 | 302 | 311 | 302 | 304 | 302 | 304 | 300 | 302 | 304 | 299-317 |
| D9S1690 | 230 | 240 | 230 | 238 | 230 | 236 | 230 | 238 | 230 | 240 | 230 | 234 | 230 | 230 | 230 | 238 | 230 | 238 | 230 | 236 | 230 | 236 | 230 | 238 | 230-244 |
| D9S1677 | 245 | 247 | 245 | 245 | 245 | 245 | 247 | 245 | 247 | 247 | 245 | 242 | 247 | 242 | 247 | 245 | 247 | 245 | 245 | 242 | 245 | 247 | 257 | 242 | 234-258 |
| D9S1776 | 188 | 182 | 188 | 188 | 188 | 184 | 182 | 188 | 182 | 186 | 182 | 188 | 186 | 182 | 186 | 184 | 186 | 184 | 188 | 186 | 188 | 180 | 184 | 186 | 176-214 |
| D9S1682 | 158 | 150 | 158 | 150 | 158 | 150 | 158 | 150 | 158 | 158 | 150 | 160 | 154 | 150 | 150 | 152 | 154 | 152 | 154 | 154 | 154 | 152 | 158 | 152 | 152-162 |
| D9S290  | 250 | 258 | 250 | 256 | 250 | 256 | 250 | 258 | 250 | 258 | 250 | 256 | 250 | 254 | 250 | 254 | 254 | 254 | 252 | 254 | 252 | 256 | 250 | 248 | 246-268 |
| D9S164  | 95  | 90  | 95  | 97  | 95  | 97  | 95  | 89  | 95  | 90  | 95  | 101 | 95  | 91  | 95  | 91  | 95  | 95  | 103 | 99  | 103 | 97  | 93  | 103 | 90-106  |
| D9S1826 | 222 | 222 | 222 | 222 | 222 | 222 | 222 | 222 | 222 | 224 | 222 | 222 | 222 | 224 | 222 | 226 | 224 | 226 | 222 | 224 | 222 | 224 | 222 | 224 | 219-233 |
| D9S158  |     |     | 340 | 340 | 340 | 340 | 342 | 340 | 342 | 344 | 340 | 349 | 340 | 344 | 340 | 342 | 344 | 342 | 340 | 340 | 340 | 340 | 340 | 342 | 333-357 |

### Chromosome 10



|          |     |     |     |     |     |     |     |     |     |     |     |     |     |     |     |     |     |     |     |     |     |     |     |     |         |         |
|----------|-----|-----|-----|-----|-----|-----|-----|-----|-----|-----|-----|-----|-----|-----|-----|-----|-----|-----|-----|-----|-----|-----|-----|-----|---------|---------|
| D11S902  | 163 | 163 | 163 | 155 | 163 | 165 | 161 | 159 | 161 | 159 | 161 | 161 | 161 | 153 | 161 | 159 | 161 | 159 | 153 | 161 | 153 | 163 | 161 | 165 | 152-172 |         |
| D11S904  | 200 | 186 | 200 | 186 | 200 | 200 | 200 | 202 | 200 | 200 | 200 | 202 | 188 | 188 | 188 | 202 | 188 | 202 | 188 | 188 | 188 | 188 | 188 | 193 | 187-215 |         |
| D11S935  | 208 | 214 | 208 | 212 | 212 | 214 | 214 | 208 | 214 | 204 | 208 | 214 | 204 | 204 | 204 | 212 | 204 | 212 | 204 | 204 | 204 | 206 | 204 | 204 | 200-222 |         |
| D11S905  | 277 | 277 | 277 | 283 | 277 | 283 | 277 | 277 | 277 | 277 | 277 | 277 | 277 | 279 | 277 | 277 | 277 | 277 | 289 | 279 | 289 | 285 | 277 | 291 | 272-298 |         |
| D11S4191 | 96  | 98  | 96  | 96  | 98  | 98  | 96  | 98  |     |     |     |     | 94  | 102 |     |     | 94  | 96  | 94  | 92  | 94  | 92  |     |     | 94-124  |         |
| D11S987  | 123 | 123 | 123 | 125 | 123 | 125 | 123 | 123 | 123 | 123 | 123 | 123 | 125 | 121 | 129 | 125 | 121 | 129 | 121 | 125 | 121 | 123 | 123 | 123 | 100-138 |         |
| D11S314  |     |     | 111 | 105 | 105 | 105 | 113 | 111 | 113 | 113 | 113 | 111 | 107 | 113 | 107 | 99  | 113 | 99  | 113 | 111 | 113 | 109 | 111 | 113 | 97-123  |         |
| D11S937  | 160 | 172 | 160 | 164 | 172 | 164 | 172 | 160 | 172 | 162 | 160 | 162 | 174 | 162 | 174 | 160 | 160 | 162 | 162 | 160 | 162 | 174 | 160 | 160 | 149-183 |         |
| D11S901  | 312 | 318 | 312 | 318 | 318 | 318 | 318 | 312 | 318 | 322 | 312 | 322 | 318 | 320 | 320 | 326 | 318 | 326 | 324 | 312 | 324 | 320 | 312 | 312 | 314-330 |         |
| D11S4175 | 297 | 297 | 297 | 318 | 297 | 318 | 297 | 297 | 297 | 326 | 297 | 326 |     |     | 297 | 332 | 297 |     | 297 | 297 | 297 | 297 | 167 | 334 | 290-342 |         |
| D11S898  | 153 | 149 | 153 | 158 | 149 | 158 | 153 | 158 | 153 | 153 | 153 | 153 | 149 | 158 | 149 | 156 | 158 | 156 | 153 | 151 | 153 | 153 | 153 | 151 | 144-166 |         |
| D11S908  | 181 | 183 | 181 | 185 | 183 | 185 | 181 | 183 | 181 | 183 | 181 | 183 | 183 | 181 | 183 | 183 | 181 | 179 | 181 | 183 | 181 | 183 | 181 | 183 | 175-191 |         |
| D11S925  | 288 |     | 288 |     |     |     |     |     | 288 | 280 | 288 | 280 | 280 | 280 | 280 | 282 | 280 | 284 | 280 | 284 | 284 | 284 | 284 | 272 | 265-293 |         |
| D11S4151 | 338 | 336 | 338 | 338 | 338 | 336 | 338 | 336 | 338 | 338 | 338 | 338 | 338 | 338 | 338 | 338 | 340 | 338 | 340 | 340 | 344 | 340 | 344 | 344 | 336     | 335-347 |
| D11S1320 |     |     | 273 | 275 | 273 | 275 | 267 | 275 | 267 | 275 | 267 | 275 | 267 | 271 | 267 | 267 | 271 | 265 | 267 | 271 | 267 | 269 | 267 | 271 | 264-280 |         |
| D11S968  | 151 | 153 | 151 | 151 | 151 | 148 | 151 | 148 | 151 | 148 | 151 | 148 | 151 | 153 | 153 | 153 | 151 | 151 | 151 | 151 | 151 | 153 | 151 | 159 | 144-164 |         |

**Chromosome 12**

| Marker   | 5   | 20  | 18  | 1   | 12  | 11  | 7   | 21  | 24  | 8   | 25  | 26  | Size    |
|----------|-----|-----|-----|-----|-----|-----|-----|-----|-----|-----|-----|-----|---------|
| D12S352  | 166 | 166 | 166 | 166 | 166 | 166 | 166 | 166 | 166 | 166 | 166 | 166 | 156-176 |
| D12S99   | 274 | 283 | 274 | 274 | 283 | 289 | 274 | 287 | 283 | 274 | 283 | 287 | 268-300 |
| D12S336  | 119 | 119 | 119 | 119 | 119 | 119 | 119 | 119 | 119 | 119 | 119 | 119 | 117-135 |
| D12S364  | 320 | 320 | 320 | 304 | 320 | 322 | 310 | 310 | 310 | 318 | 310 | 318 | 300-320 |
| D12S310  |     |     |     |     | 256 | 256 | 256 | 262 |     |     |     |     | 248-256 |
| D12S1617 | 261 | 265 | 261 | 263 | 265 | 263 | 261 | 259 | 261 | 257 | 261 | 257 | 250-270 |
| D12S156  | 288 | 281 | 288 | 292 | 281 | 292 | 281 | 288 | 281 | 284 | 281 | 284 | 280-300 |
| D12S345  | 219 | 227 | 219 | 243 | 227 | 235 | 219 | 239 | 219 | 231 | 219 | 231 | 215-251 |

|          |     |     |     |     |     |     |     |     |     |     |     |     |     |     |     |     |     |     |     |     |     |     |     |         |         |
|----------|-----|-----|-----|-----|-----|-----|-----|-----|-----|-----|-----|-----|-----|-----|-----|-----|-----|-----|-----|-----|-----|-----|-----|---------|---------|
| D12S85   | 134 | 122 | 134 | 110 | 134 | 122 | 134 | 128 | 128 | 122 | 122 | 134 | 110 | 128 | 110 | 110 | 110 | 128 | 110 | 128 | 110 | 128 | 110 | 128     | 104-136 |
| D12S368  | 210 | 216 | 210 | 206 | 216 | 206 | 214 | 210 | 214 | 218 | 210 | 218 | 216 | 216 | 208 | 216 | 208 | 216 | 216 | 216 | 210 | 212 | 218 | 206-226 |         |
| D12S83   | 111 | 107 | 111 | 111 | 111 | 107 | 113 | 111 | 113 | 113 | 113 | 113 | 115 | 107 | 115 | 107 | 115 | 115 | 115 | 107 | 115 | 107 | 115 | 113     | 107-127 |
| D12S326  | 227 | 233 | 227 | 211 | 233 | 211 | 227 | 232 | 233 | 225 | 227 | 225 | 235 | 227 | 235 | 227 | 235 | 235 | 227 | 223 | 227 | 211 | 235 | 233     | 210-236 |
| D12S351  | 159 | 167 | 159 | 165 | 159 | 167 | 159 | 167 | 159 | 167 | 159 | 167 | 159 | 167 | 159 | 163 | 167 | 163 | 159 | 159 | 159 | 159 | 167 | 167     | 151-173 |
| D12S1265 | 301 | 301 | 301 | 286 | 301 | 297 | 301 | 303 | 301 | 299 | 301 | 299 | 301 | 301 | 301 | 297 | 301 | 301 | 301 | 301 | 301 | 297 | 301 | 299     | 280-310 |
| D12S346  | 192 | 207 | 192 | 196 | 192 | 196 | 188 | 207 | 188 | 207 | 188 | 186 | 188 | 188 | 188 | 186 | 188 | 188 | 192 | 202 | 192 | 188 | 192 | 188     | 191-217 |
| D12S78   | 195 | 195 | 195 | 179 | 195 | 205 | 195 | 193 | 195 | 187 | 193 | 187 | 193 | 191 | 193 | 181 | 191 | 181 | 195 | 197 | 195 | 195 | 191 | 191     | 177-215 |
| D12S79   | 173 | 161 | 173 | 169 | 173 | 169 | 161 | 173 | 161 | 169 | 173 | 169 | 161 | 173 | 173 | 169 | 161 | 169 | 169 | 163 | 169 | 169 | 170 | 163     | 163-189 |
| D12S86   | 157 | 133 | 157 | 153 | 157 | 155 | 155 | 157 | 153 | 135 | 153 | 157 | 151 | 157 | 151 | 157 | 151 | 159 | 141 | 151 | 141 | 149 | 141 | 141     | 132-172 |
| D12S324  | 246 | 250 | 240 | 250 | 246 | 252 | 246 | 250 | 246 | 250 | 246 | 246 | 246 | 252 | 246 | 248 | 252 | 248 | 246 | 252 | 246 | 250 | 246 | 250     | 238-260 |
| D12S1659 | 306 | 310 | 306 | 321 | 306 | 321 | 310 | 306 | 310 | 302 | 306 | 302 | 306 | 310 | 306 | 310 | 310 | 310 | 314 | 310 | 314 | 306 | 306 | 325     | 294-320 |
| D12S1723 | 211 | 209 | 211 | 215 | 211 | 213 | 211 | 209 | 211 | 204 | 211 | 215 | 209 | 209 | 209 | 209 | 209 | 209 | 209 | 209 | 209 | 209 | 211 | 215     | 201-219 |

## Chromosome 13

| Marker  | 5   |     | 20  |     | 18  |     | 1   |     | 12  |     | 11  |     | 7   |     | 21  |     | 24  |     | 8   |     | 25  |     | 26  |     | Size    |
|---------|-----|-----|-----|-----|-----|-----|-----|-----|-----|-----|-----|-----|-----|-----|-----|-----|-----|-----|-----|-----|-----|-----|-----|-----|---------|
| D13S175 | 109 | 109 | 109 | 117 | 109 | 119 | 109 | 113 | 109 | 111 | 109 | 113 | 109 | 115 | 109 | 109 | 115 | 115 | 111 | 115 | 111 | 111 | 111 | 115 | 105-123 |
| D13S217 | 256 | 258 | 256 | 258 | 256 | 256 | 256 | 258 | 256 | 258 | 256 | 254 | 256 | 256 | 256 | 254 | 256 | 254 | 256 | 256 | 256 | 260 | 256 | 254 | 246-266 |
| D13S171 | 199 | 199 | 199 | 189 | 199 | 189 | 199 | 199 | 199 | 185 | 199 | 189 | 199 | 199 | 199 | 189 | 189 | 199 | 189 | 199 |     |     | 199 | 185 | 179-207 |
| D13S218 | 150 | 155 | 150 | 150 | 150 | 155 | 150 | 150 | 150 | 152 | 150 | 148 | 150 | 155 | 150 | 153 | 150 | 153 | 150 | 150 | 150 | 150 | 157 | 148 | 145-157 |
| D13S263 | 170 | 168 | 170 | 168 | 170 | 170 | 168 | 170 | 168 | 174 | 170 | 172 | 174 | 170 | 174 | 174 | 174 | 174 | 158 | 174 | 178 | 160 | 170 | 158 | 150-178 |
| D13S153 | 104 | 102 | 104 | 106 | 102 | 106 | 104 | 100 | 104 | 98  | 104 | 100 | 100 | 102 | 100 | 120 | 102 | 102 | 102 | 100 | 102 | 98  | 102 | 100 | 94-126  |
| D13S170 | 160 | 164 | 164 | 168 | 160 | 160 | 164 | 160 | 160 | 168 | 164 | 170 | 164 | 160 | 164 | 158 | 164 | 158 | 158 | 164 | 158 | 160 | 164 | 168 | 146-176 |
| D13S265 | 111 | 117 | 111 | 113 | 111 | 113 | 111 | 113 | 111 | 111 | 113 | 113 |     |     | 113 | 113 | 113 | 113 | 113 | 113 | 113 | 119 | 113 | 117 | 93-131  |
| D13S159 | 165 | 167 | 165 | 172 | 165 | 172 | 165 | 184 | 165 | 186 | 184 | 189 | 189 | 165 | 189 | 163 | 189 | 167 | 184 | 169 | 184 | 186 | 170 | 167 | 157-199 |
| D13S158 | 127 | 133 | 127 | 121 | 127 | 121 | 127 | 121 | 127 | 127 | 127 | 121 | 127 | 133 | 127 | 133 | 127 | 133 | 131 | 127 | 131 | 131 | 127 | 133 | 121-139 |
| D13S173 | 245 | 241 | 245 | 245 | 245 | 243 | 245 | 245 | 245 | 247 | 245 | 247 | 245 | 245 | 245 | 241 | 245 | 245 | 247 | 245 | 247 | 249 | 245 | 245 | 237-257 |

|         |     |     |     |     |     |     |     |     |     |     |     |     |     |     |     |     |     |     |     |     |     |     |     |     |        |
|---------|-----|-----|-----|-----|-----|-----|-----|-----|-----|-----|-----|-----|-----|-----|-----|-----|-----|-----|-----|-----|-----|-----|-----|-----|--------|
| D13S285 | 108 | 100 | 108 | 102 | 108 | 102 | 108 | 112 | 108 | 112 | 108 | 108 | 108 | 108 | 108 | 106 | 108 | 106 | 108 | 100 | 108 | 110 | 108 | 100 | 93-119 |
|---------|-----|-----|-----|-----|-----|-----|-----|-----|-----|-----|-----|-----|-----|-----|-----|-----|-----|-----|-----|-----|-----|-----|-----|-----|--------|

## Chromosome 14

| Marker  | 5   |     | 20  |     | 18  |     | 1   |     | 12  |     | 11  |     | 7   |     | 21  |     | 24  |     | 8   |     | 25  |     | 26  |     | Size    |
|---------|-----|-----|-----|-----|-----|-----|-----|-----|-----|-----|-----|-----|-----|-----|-----|-----|-----|-----|-----|-----|-----|-----|-----|-----|---------|
| D14S261 | 305 | 300 | 305 | 298 | 300 | 298 | 300 | 305 | 300 | 305 | 300 | 300 | 300 | 303 | 298 | 303 | 300 | 300 | 300 | 303 | 300 | 303 | 300 | 303 | 276-308 |
| D14S283 | 132 | 132 | 132 | 140 | 132 | 132 | 132 | 132 | 132 | 132 | 132 | 142 | 132 | 132 | 132 | 152 | 132 | 146 | 132 | 132 |     |     | 132 | 152 | 132-162 |
| D14S275 | 154 | 157 | 152 | 154 | 152 | 154 | 154 | 154 | 154 | 154 | 154 | 157 | 152 | 152 | 152 | 157 | 152 | 152 | 152 | 152 | 152 | 154 | 152 | 157 | 150-164 |
| D14S70  | 107 | 109 | 107 | 113 | 107 | 109 | 107 | 113 | 107 | 109 | 113 | 109 | 107 | 109 | 107 | 109 | 109 | 109 | 107 | 109 | 107 | 115 | 107 | 109 | 103-119 |
| D14S288 | 210 | 188 | 210 | 198 | 210 | 208 | 210 | 214 | 210 | 198 | 210 | 214 | 210 | 198 | 210 | 206 | 198 | 206 | 210 | 198 | 210 | 206 | 210 | 208 | 196-220 |
| D14S276 | 249 | 243 | 249 | 245 | 249 | 245 | 247 | 249 | 247 | 247 | 247 | 247 | 249 | 241 | 249 | 245 | 241 | 245 | 249 | 241 | 249 | 245 | 247 | 247 | 241-253 |
| D14S63  | 198 | 194 | 198 | 198 | 194 | 194 | 198 | 198 | 198 | 186 | 198 | 192 | 198 | 192 | 198 | 196 | 198 | 196 | 192 | 192 |     |     | 188 | 190 | 180-198 |
| D14S258 | 200 | 202 | 200 | 200 | 202 | 202 | 200 | 200 | 200 | 206 | 200 | 200 | 200 | 204 | 200 | 204 | 200 | 206 | 200 | 198 | 200 | 200 | 206 | 202 | 198-218 |
| D14S74  | 308 | 310 | 308 | 310 | 308 | 308 | 310 | 308 | 310 | 306 | 308 | 314 | 310 | 314 | 310 | 312 | 310 | 302 | 310 | 314 | 310 | 308 | 306 | 303 | 301-325 |
| D14S68  | 328 | 324 | 328 | 337 | 324 | 326 | 328 | 332 | 328 | 320 | 320 | 337 | 318 | 330 | 328 | 332 | 330 | 328 | 330 | 328 | 330 | 334 | 322 | 334 | 321-351 |
| D14S280 | 251 | 243 | 251 | 243 | 251 | 247 | 245 | 243 | 245 | 243 | 245 | 245 | 243 | 245 | 243 | 253 | 243 | 253 | 243 | 251 | 243 | 247 | 247 | 247 | 243-263 |
| D14S65  | 131 | 149 | 131 | 141 | 149 |     | 155 | 157 | 155 | 131 | 155 | 157 | 157 | 153 | 157 | 153 | 151 | 153 | 151 | 149 | 151 | 149 | 151 | 153 | 129-161 |
| D14S985 | 248 | 246 | 248 | 246 | 248 | 250 | 246 | 256 | 246 | 252 | 256 | 252 | 250 | 252 | 250 | 250 | 250 | 252 | 252 | 252 | 252 | 248 | 252 | 256 | 244-258 |
| D14S292 | 97  | 95  | 97  | 101 | 95  | 91  | 97  | 93  | 97  | 91  | 93  | 91  | 95  | 95  | 95  | 95  | 95  | 95  | 95  | 93  | 95  | 95  | 95  | 95  | 88-104  |

## Chromosome 15

| Marker   | 5   |     | 20  |     | 18  |     | 1   |     | 12  |     | 11  |     | 7   |     | 21  |     | 24  |     | 8   |     | 25  |     | 26  |     | Size    |
|----------|-----|-----|-----|-----|-----|-----|-----|-----|-----|-----|-----|-----|-----|-----|-----|-----|-----|-----|-----|-----|-----|-----|-----|-----|---------|
| D15S128  | 209 | 209 | 209 | 207 | 209 | 207 | 209 | 209 | 209 | 207 | 209 | 207 | 209 | 201 | 209 | 199 | 201 | 199 | 201 | 209 | 201 | 205 | 201 | 207 | 201-219 |
| D15S1002 | 125 | 125 | 125 | 127 | 125 | 127 | 125 | 125 | 125 | 127 | 125 | 127 | 113 | 113 | 113 | 113 | 113 | 125 | 113 | 113 | 113 | 113 | 113 | 115 | 110-138 |
| D15S165  | 205 | 205 | 205 | 190 | 205 | 190 | 205 | 205 | 205 | 190 | 205 | 190 | 200 | 190 | 200 | 200 | 190 | 205 | 190 | 200 | 190 | 190 | 207 | 190 | 185-217 |
| D15S1007 | 94  | 100 | 94  | 98  | 94  | 98  | 106 | 98  | 106 | 106 | 106 | 106 | 94  | 96  | 94  | 100 | 96  | 98  | 96  | 94  | 96  | 106 | 96  | 98  | 89-113  |
| D15S1012 | 105 | 97  | 105 | 111 | 105 | 111 | 105 | 101 | 105 | 101 | 105 | 105 | 101 | 107 | 101 | 111 | 107 | 105 | 107 | 101 | 107 | 111 | 99  | 111 | 98-116  |

|         |     |     |     |     |     |     |     |     |     |     |     |     |     |     |     |     |     |     |     |     |     |     |     |     |         |
|---------|-----|-----|-----|-----|-----|-----|-----|-----|-----|-----|-----|-----|-----|-----|-----|-----|-----|-----|-----|-----|-----|-----|-----|-----|---------|
| D15S994 | 308 | 306 | 308 | 306 | 306 | 308 | 308 | 310 | 308 | 308 | 308 | 310 | 308 | 314 |     |     | 308 | 308 | 314 | 306 | 314 | 306 | 308 | 316 | 306-318 |
| D15S978 | 205 | 191 | 205 | 193 | 205 | 193 | 211 | 193 | 211 | 209 | 193 | 209 | 193 | 191 | 193 | 191 | 193 | 209 | 205 | 191 | 205 | 191 | 193 | 193 | 187-215 |
| D15S117 | 324 | 329 |     |     | 329 | 337 | 339 | 329 | 339 | 339 | 339 | 329 | 331 | 341 | 331 | 331 | 331 | 337 | 329 | 331 | 329 | 339 | 329 | 331 | 324-342 |
| D15S153 | 263 | 258 | 263 | 244 | 263 | 263 | 258 | 263 | 267 | 263 | 267 | 258 | 267 | 263 | 267 | 244 | 267 | 271 | 261 | 263 | 261 | 263 | 267 | 244 | 244-278 |
| D15S131 | 244 | 262 | 246 | 262 | 244 | 246 | 262 | 244 | 262 | 269 | 244 | 269 | 273 | 246 | 273 | 250 | 273 | 246 | 262 | 246 | 262 | 269 | 267 | 246 | 244-284 |
| D15S205 | 160 | 146 | 160 | 164 | 146 | 163 | 146 | 160 | 146 | 134 | 146 | 134 | 158 | 150 | 158 | 168 | 158 | 160 | 160 | 162 | 160 | 154 | 160 | 150 | 130-170 |
| D15S127 | 151 | 150 | 151 | 141 | 151 | 141 | 151 | 149 | 151 | 136 | 151 | 157 | 143 | 149 | 143 | 143 | 149 | 133 | 151 | 139 | 151 | 133 | 143 | 120 | 121-157 |
| D15S130 | 291 | 291 | 291 | 287 | 291 | 287 | 291 | 291 | 291 | 295 | 291 | 291 | 291 | 291 | 298 | 291 | 291 | 298 | 293 | 291 | 291 | 291 | 291 | 298 | 288-302 |
| D15S120 | 178 | 157 | 178 | 174 | 178 | 174 | 157 | 178 | 157 | 176 | 178 | 176 | 167 | 178 | 176 | 167 | 178 | 176 | 178 | 167 | 178 | 176 | 178 | 176 | 158-186 |

**Chromosome 16**

| Marker   | 5   |     | 20  |     | 18  |     | 1   |     | 12  |     | 11  |     | 7   |     | 21  |     | 24  |     | 8   |     | 25  |     | 26  |     | Size    |
|----------|-----|-----|-----|-----|-----|-----|-----|-----|-----|-----|-----|-----|-----|-----|-----|-----|-----|-----|-----|-----|-----|-----|-----|-----|---------|
| D15S128  | 209 | 209 | 209 | 207 | 209 | 207 | 209 | 209 | 209 | 207 | 209 | 207 | 209 | 201 | 209 | 199 | 201 | 199 | 201 | 209 | 201 | 205 | 201 | 207 | 201-219 |
| D15S1002 | 125 | 125 | 125 | 127 | 125 | 127 | 125 | 125 | 125 | 127 | 125 | 127 | 113 | 113 | 113 | 113 | 113 | 125 | 113 | 113 | 113 | 113 | 113 | 115 | 110-138 |
| D15S165  | 205 | 205 | 205 | 190 | 205 | 190 | 205 | 205 | 205 | 190 | 205 | 190 | 200 | 190 | 200 | 200 | 190 | 205 | 190 | 200 | 190 | 190 | 207 | 190 | 185-217 |
| D15S1007 | 94  | 100 | 94  | 98  | 94  | 98  | 106 | 98  | 106 | 106 | 106 | 106 | 94  | 96  | 94  | 100 | 96  | 98  | 96  | 94  | 96  | 106 | 96  | 98  | 89-113  |
| D15S1012 | 105 | 97  | 105 | 111 | 105 | 111 | 105 | 101 | 105 | 101 | 105 | 105 | 101 | 107 | 101 | 111 | 107 | 105 | 107 | 101 | 107 | 111 | 99  | 111 | 98-116  |
| D15S994  | 308 | 306 | 308 | 306 | 306 | 308 | 308 | 310 | 308 | 308 | 308 | 310 | 308 | 314 |     |     | 308 | 308 | 314 | 306 | 314 | 306 | 308 | 316 | 306-318 |
| D15S978  | 205 | 191 | 205 | 193 | 205 | 193 | 211 | 193 | 211 | 209 | 193 | 209 | 193 | 191 | 193 | 191 | 193 | 209 | 205 | 191 | 205 | 191 | 193 | 193 | 187-215 |
| D15S117  | 324 | 329 |     |     | 329 | 337 | 339 | 329 | 339 | 339 | 339 | 329 | 331 | 341 | 331 | 331 | 331 | 337 | 329 | 331 | 329 | 339 | 329 | 331 | 324-342 |
| D15S153  | 263 | 258 | 263 | 244 | 263 | 263 | 258 | 263 | 267 | 263 | 267 | 258 | 267 | 263 | 267 | 244 | 267 | 271 | 261 | 263 | 261 | 263 | 267 | 244 | 244-278 |
| D15S131  | 244 | 262 | 246 | 262 | 244 | 246 | 262 | 244 | 262 | 269 | 244 | 269 | 273 | 246 | 273 | 250 | 273 | 246 | 262 | 246 | 262 | 269 | 267 | 246 | 244-284 |
| D15S205  | 160 | 146 | 160 | 164 | 146 | 163 | 146 | 160 | 146 | 134 | 146 | 134 | 158 | 150 | 158 | 168 | 158 | 160 | 160 | 162 | 160 | 154 | 160 | 150 | 130-170 |
| D15S127  | 151 | 150 | 151 | 141 | 151 | 141 | 151 | 149 | 151 | 136 | 151 | 157 | 143 | 149 | 143 | 143 | 149 | 133 | 151 | 139 | 151 | 133 | 143 | 120 | 121-157 |
| D15S130  | 291 | 291 | 291 | 287 | 291 | 287 | 291 | 291 | 291 | 295 | 291 | 291 | 291 | 291 | 298 | 291 | 291 | 298 | 293 | 291 | 291 | 291 | 291 | 298 | 288-302 |
| D15S120  | 178 | 157 | 178 | 174 | 178 | 174 | 157 | 178 | 157 | 176 | 178 | 176 | 167 | 178 | 176 | 167 | 178 | 176 | 178 | 167 | 178 | 176 | 178 | 176 | 158-186 |

## Chromosome 17

| Marker   | 5   |     | 20  |     | 18  |     | 1   |     | 12  |     | 11  |     | 7   |     | 21  |     | 24  |     | 8   |     | 25  |     | 26  |     | Size    |
|----------|-----|-----|-----|-----|-----|-----|-----|-----|-----|-----|-----|-----|-----|-----|-----|-----|-----|-----|-----|-----|-----|-----|-----|-----|---------|
| D17S849  | 261 | 263 | 261 | 263 | 263 | 263 | 261 | 263 | 261 | 261 | 259 | 263 | 261 | 261 | 261 | 265 | 261 | 263 | 263 | 261 | 263 | 263 | 261 | 259 | 257-271 |
| D17S831  | 120 | 130 | 120 | 120 | 130 | 114 | 120 | 116 | 120 | 122 | 116 | 122 | 120 | 122 | 120 | 112 | 120 | 114 | 130 | 120 | 130 | 132 | 120 | 130 | 112-134 |
| D17S938  | 250 | 252 | 250 | 240 | 252 | 252 | 252 | 254 | 252 | 242 | 254 | 242 | 244 | 250 | 244 | 254 | 244 | 254 | 250 | 244 | 250 | 252 | 242 | 244 | 242-262 |
| D17S1852 | 291 | 291 | 291 | 299 | 291 | 305 | 291 | 291 | 291 | 309 | 291 | 309 | 301 | 309 | 301 | 303 | 301 | 291 | 311 | 301 | 311 | 301 | 303 | 311 | 283-311 |
| D17S799  | 199 | 203 | 199 | 199 | 203 | 193 | 199 | 203 | 199 | 203 | 199 | 203 | 203 | 203 | 199 | 203 | 203 | 203 | 203 | 203 | 203 | 189 | 199 | 203 | 189-211 |
| D17S921  | 203 | 210 | 203 | 210 | 203 | 210 | 203 | 210 | 203 | 210 | 203 | 210 | 203 | 212 | 203 | 212 | 203 | 212 | 203 | 205 | 203 | 210 | 203 | 212 | 196-214 |
| D17S1857 | 167 | 171 | 167 | 169 | 171 | 165 | 167 | 171 | 167 | 167 | 167 | 167 | 169 | 173 | 169 | 169 | 169 | 175 | 173 | 173 | 173 | 171 | 169 | 171 | 167-177 |
| D17S798  | 316 | 316 | 316 | 316 | 316 | 301 | 316 | 316 | 316 | 314 | 316 | 314 | 316 | 314 | 316 | 316 | 316 | 314 | 316 | 301 | 316 | 316 | 301 | 301 | 300-324 |
| D17S1868 | 260 | 262 | 260 | 260 | 262 | 262 | 260 | 262 | 260 | 264 | 260 | 266 | 260 | 266 | 260 | 266 | 260 | 266 | 266 | 264 | 266 | 264 | 260 | 258 | 258-272 |
| D17S787  | 158 | 172 | 158 | 172 | 172 | 158 | 172 | 158 | 172 | 147 | 172 | 172 | 172 | 172 | 172 | 158 | 172 | 158 | 172 | 146 | 172 | 158 | 158 | 146 | 142-178 |
| D17S944  | 325 | 327 |     |     | 325 | 327 | 325 | 331 | 325 | 325 | 325 | 331 | 325 | 331 | 325 | 325 | 325 | 325 | 331 | 331 | 331 | 325 | 333 | 331 | 319-335 |
| D17S949  | 230 | 226 | 230 | 220 | 226 | 220 | 220 | 226 | 220 | 226 | 220 | 216 | 228 | 216 | 228 | 226 | 228 | 226 | 216 | 226 | 216 | 220 | 230 | 220 | 214-232 |
| D17S785  | 173 | 175 | 173 | 177 | 175 | 177 | 177 | 187 | 177 | 192 | 177 | 177 | 179 | 179 | 179 | 179 | 179 | 179 | 179 | 175 | 179 | 185 | 181 | 185 | 169-197 |
| D17S784  | 241 | 235 | 241 | 243 | 235 | 243 | 236 | 241 | 236 | 238 | 236 | 238 | 236 | 241 | 236 | 241 | 236 | 238 | 236 | 236 | 236 | 236 | 238 | 238 | 233-247 |
| D17S928  | 90  | 86  | 90  | 88  | 90  | 88  | 90  | 94  | 90  | 86  | 90  | 90  | 90  | 92  | 90  | 90  | 90  | 86  | 86  | 90  | 86  | 78  | 92  | 86  | 74-108  |

## Chromosome 18

| Marker  | 5   |     | 20  |     | 18  |     | 1   |     | 12  |     | 11  |     | 7   |     | 21  |     | 24  |     | 8   |     | 25  |     | 26  |     | Size    |
|---------|-----|-----|-----|-----|-----|-----|-----|-----|-----|-----|-----|-----|-----|-----|-----|-----|-----|-----|-----|-----|-----|-----|-----|-----|---------|
| D18S59  | 163 | 165 | 163 | 157 | 163 | 165 | 165 | 167 | 161 | 165 | 161 | 167 | 157 | 157 | 167 | 157 | 157 | 163 | 157 | 157 | 157 | 157 | 161 | 157 | 154-176 |
| D18S63  | 86  | 86  | 86  | 98  | 86  | 102 | 86  | 102 | 86  | 86  | 86  | 102 | 106 | 102 | 106 | 102 | 106 | 102 | 102 | 106 | 102 | 102 | 110 | 102 | 80-106  |
| D18S452 | 145 | 145 | 145 | 133 | 145 | 133 | 145 | 141 | 145 | 135 | 141 | 135 | 145 | 141 | 145 | 133 | 141 | 141 | 149 | 141 | 149 | 145 | 137 | 137 | 131-149 |
| D18S464 | 312 | 314 | 312 | 310 | 314 | 310 | 312 | 312 | 312 | 312 | 312 | 312 | 312 | 310 | 312 | 310 | 312 | 314 | 310 | 312 | 310 | 312 | 312 | 309 | 303-319 |
| D18S53  | 172 | 168 | 172 | 164 | 168 | 164 | 172 | 168 | 172 | 170 | 168 | 176 | 172 | 168 | 172 | 172 | 172 | 168 | 172 | 168 | 172 | 168 | 174 | 168 | 156-186 |

|          |     |     |     |     |     |     |     |     |     |     |     |     |     |     |     |     |     |     |     |     |     |     |     |     |         |
|----------|-----|-----|-----|-----|-----|-----|-----|-----|-----|-----|-----|-----|-----|-----|-----|-----|-----|-----|-----|-----|-----|-----|-----|-----|---------|
| D18S478  | 247 | 257 | 247 | 257 | 247 | 247 | 257 | 251 | 257 | 251 | 247 | 251 | 247 | 247 | 247 | 252 | 247 | 247 | 247 | 247 | 247 | 247 | 247 | 257 | 247-261 |
| D18S1102 | 98  | 98  | 98  | 98  | 98  | 98  | 98  | 104 | 98  | 98  | 98  | 104 | 98  | 98  | 98  | 98  | 98  | 94  | 98  | 104 | 98  | 98  | 98  | 98  | 96-108  |
| D18S474  | 130 | 140 | 130 | 128 | 130 | 128 | 144 | 130 | 144 | 142 | 144 | 128 | 140 | 128 | 140 | 130 | 128 | 144 | 128 | 130 | 128 | 128 | 140 | 142 | 126-148 |
| D18S64   | 327 | 341 | 327 | 341 | 327 | 341 | 327 | 327 | 327 | 327 | 327 | 323 | 327 | 323 | 327 | 327 | 327 | 323 | 323 | 327 | 323 | 325 | 327 | 327 | 319-345 |
| D18S68   | 295 | 290 | 295 | 280 | 295 | 280 | 288 | 288 | 288 | 286 | 288 | 280 | 290 | 284 | 290 | 293 | 284 | 288 | 284 | 288 | 284 | 290 | 290 | 290 | 273-299 |
| D18S61   | 226 | 233 | 226 | 214 | 226 | 214 | 230 | 233 | 230 | 214 | 230 | 216 | 233 | 231 | 233 | 226 | 231 | 228 | 231 | 233 | 231 | 216 | 230 | 233 | 213-243 |
| D18S1161 | 233 | 233 | 233 | 233 | 233 | 233 | 237 | 243 | 237 | 247 | 237 | 235 | 233 | 245 | 233 | 245 | 245 | 245 | 245 | 243 | 245 | 233 | 233 | 237 | 215-241 |
| D18S462  | 306 | 306 | 306 | 310 | 306 | 310 | 306 | 308 | 306 | 308 | 306 | 308 | 306 | 306 | 306 | 306 | 306 | 306 | 310 | 306 | 310 | 310 | 306 | 308 | 300-322 |
| D18S70   | 118 | 119 | 118 | 117 | 118 | 117 | 116 | 115 | 116 | 125 | 116 | 125 | 117 | 119 | 117 | 117 | 117 | 117 | 119 | 119 | 119 | 125 | 115 | 119 | 115-135 |

## Chromosome 19

| Marker  | 5   |     | 20  |     | 18  |     | 1   |     | 12  |     | 11  |     | 7   |     | 21  |     | 24  |     | 8   |     | 25  |     | 26  |     | Size    |         |
|---------|-----|-----|-----|-----|-----|-----|-----|-----|-----|-----|-----|-----|-----|-----|-----|-----|-----|-----|-----|-----|-----|-----|-----|-----|---------|---------|
| D19S209 | 248 | 253 | 248 | 246 | 248 | 246 |     |     | 250 | 248 | 250 | 254 | 254 | 248 | 254 | 242 | 254 | 248 | 248 | 244 |     |     |     |     | 243-259 |         |
| D19S216 | 272 | 266 | 272 | 268 | 272 | 268 | 272 | 266 | 268 | 272 | 268 | 266 | 270 | 260 | 270 | 262 | 270 | 260 | 266 | 260 | 266 | 260 | 266 | 268 | 266     | 258-276 |
| D19S884 | 95  | 100 | 95  | 103 | 95  | 103 | 100 | 95  | 111 | 95  | 111 | 100 | 101 | 101 | 101 | 107 | 95  | 101 | 111 | 95  | 111 | 101 | 111 | 113 | 97-117  |         |
| D19S221 | 109 | 111 |     |     | 109 | 109 | 109 | 111 | 109 | 105 | 109 | 109 | 109 | 103 | 109 | 103 | 109 | 109 | 109 | 101 | 109 | 105 | 101 | 111 | 91-115  |         |
| D19S226 | 253 | 251 | 253 | 257 | 251 | 257 | 253 | 247 | 253 | 251 | 251 | 247 | 253 | 251 | 253 | 261 | 251 | 261 | 251 | 242 | 251 | 251 | 251 | 242 | 241-273 |         |
| D19S414 | 189 | 191 | 189 | 185 | 189 | 191 | 193 | 170 | 170 | 189 | 193 | 189 | 170 | 189 | 170 | 191 | 170 | 193 | 193 | 189 | 193 | 181 | 170 | 195 | 168-198 |         |
| D19S220 | 286 | 280 | 286 | 280 | 286 | 274 | 282 | 278 | 282 | 284 | 282 | 282 | 280 | 278 | 280 | 282 | 280 | 286 | 280 | 280 | 280 | 278 | 282 | 278 | 271-295 |         |
| D19S420 | 111 | 111 |     |     | 111 | 111 | 109 | 99  | 109 | 105 | 109 | 117 | 107 | 111 | 103 | 107 | 107 | 111 | 107 | 99  | 107 | 113 | 95  | 114 | 101-121 |         |
| D19S902 | 241 | 251 | 241 | 257 | 241 | 261 | 251 | 241 | 251 | 253 | 251 | 241 | 251 | 251 | 251 | 253 | 251 | 253 | 253 | 241 | 253 | 251 | 251 | 253 | 241-277 |         |
| D19S571 | 310 | 318 | 310 | 289 | 310 | 289 | 312 | 314 | 312 | 314 | 312 | 289 | 318 | 316 | 318 | 318 | 318 | 306 | 314 | 314 | 314 | 289 | 314 | 314 | 290-322 |         |
| D19S418 | 95  | 91  | 95  | 91  | 95  | 91  | 99  | 99  | 99  | 99  | 99  | 101 | 95  | 95  | 95  | 91  | 95  | 95  | 97  | 97  | 97  | 93  | 95  | 97  | 90-110  |         |
| D19S210 | 179 | 181 | 179 | 183 | 179 | 183 | 189 | 181 | 189 | 179 | 189 | 181 | 179 | 181 | 179 | 184 | 181 | 181 | 179 | 179 | 179 | 179 | 179 | 181 | 175-195 |         |

## Chromosome 20



| Marker  | 5   |     | 20  |     | 18  |     | 1   |     | 12  |     | 11  |     | 7   |     | 21  |     | 24  |     | 8   |     | 25  |     | 26  |     | Size    |
|---------|-----|-----|-----|-----|-----|-----|-----|-----|-----|-----|-----|-----|-----|-----|-----|-----|-----|-----|-----|-----|-----|-----|-----|-----|---------|
| D20S117 | 176 | 176 | 176 | 174 | 176 | 174 | 178 | 176 | 178 | 172 | 178 | 172 | 176 | 152 | 176 | 178 | 152 | 152 | 180 | 178 | 180 | 160 | 176 | 180 | 154-190 |
| D20S889 | 117 | 117 |     |     | 117 | 100 | 103 | 117 | 103 | 93  | 103 | 93  | 117 | 100 | 117 | 95  | 100 | 100 | 113 | 117 | 113 | 105 | 117 | 113 | 93-129  |
| D20S115 | 240 | 242 | 240 | 242 | 240 | 240 | 244 | 240 | 244 | 235 | 244 | 244 | 242 | 244 | 242 | 242 | 242 | 244 | 242 | 240 | 242 | 244 | 242 | 244 | 238-250 |
| D20S186 | 127 | 153 | 127 | 135 | 127 | 127 | 125 | 125 | 125 | 125 | 125 | 125 | 125 | 131 | 125 | 127 | 131 | 127 | 131 | 125 | 131 | 135 | 131 | 133 | 117-143 |
| D20S112 | 225 | 229 | 225 | 227 | 229 | 233 | 225 | 225 | 225 |     | 225 | 229 | 225 | 223 | 225 | 232 | 223 | 235 | 223 | 237 | 223 | 217 | 225 | 223 | 217-241 |
| D20S195 | 145 | 132 | 145 | 151 | 145 | 155 | 149 | 149 | 149 | 139 | 149 | 139 | 149 | 145 | 149 | 149 | 149 | 149 | 131 | 143 | 131 | 147 | 147 | 132 | 133-159 |
| D20S107 | 208 | 214 | 208 | 216 | 208 | 216 | 216 | 218 | 216 | 208 | 218 | 208 | 210 | 214 | 210 | 212 | 214 | 212 | 214 | 214 | 214 | 214 | 212 | 214 | 200-224 |
| D20S119 |     |     | 113 | 115 | 113 | 115 | 123 | 121 | 123 | 123 | 123 | 121 | 123 | 111 | 123 | 121 | 123 | 121 | 117 | 113 | 117 | 121 | 111 | 113 | 109-129 |
| D20S178 | 190 | 184 | 190 | 190 | 190 | 190 | 186 | 186 | 186 | 184 | 184 | 184 | 186 | 192 | 186 | 186 | 186 | 186 | 184 | 184 | 184 | 190 | 190 | 190 | 182-198 |
| D20S196 | 291 | 291 | 291 | 291 | 291 | 291 | 287 | 287 | 289 | 287 | 289 | 289 | 287 | 291 | 287 | 289 | 287 | 289 | 291 | 287 | 291 | 277 | 287 | 285 | 263-299 |
| D20S100 | 231 | 225 | 231 | 227 | 225 | 227 | 227 | 231 | 227 | 225 | 231 | 225 | 225 | 237 | 225 | 225 | 225 | 225 | 225 | 227 | 225 | 225 | 231 | 227 | 213-239 |
| D20S171 | 145 | 147 | 145 | 147 | 145 | 145 | 147 | 147 | 147 |     | 147 | 151 | 145 | 131 | 145 | 149 | 145 | 149 | 145 | 149 | 145 | 145 | 143 | 149 | 130-158 |
| D20S173 | 130 | 178 | 130 | 187 | 178 | 187 | 178 | 130 | 130 | 178 | 130 | 130 | 178 | 178 | 178 | 178 | 178 | 178 | 178 | 178 | 178 | 178 | 191 | 178 | 131-185 |

**Chromosome 21**

| Marker   | 5   |     | 20  |     | 18  |     | 1   |     | 12  |     | 11  |     | 7   |     | 21  |     | 24  |     | 8   |     | 25  |     | 26  |     | Size    |
|----------|-----|-----|-----|-----|-----|-----|-----|-----|-----|-----|-----|-----|-----|-----|-----|-----|-----|-----|-----|-----|-----|-----|-----|-----|---------|
| D21S1256 | 123 | 107 | 123 | 107 | 123 | 107 | 123 | 107 | 123 | 111 | 107 | 109 | 107 | 115 | 107 | 107 | 107 | 115 | 115 | 109 | 115 | 109 | 111 | 111 | 101-121 |
| D21S1914 | 270 | 266 | 270 | 266 | 270 | 268 | 270 | 268 | 270 | 276 | 270 | 276 | 268 | 272 | 268 | 266 | 272 | 274 | 276 | 274 | 276 | 278 | 272 | 276 | 262-284 |
| D21S263  | 221 | 200 | 221 | 225 | 221 | 227 | 206 | 221 | 206 | 223 | 221 | 223 | 214 | 204 | 214 | 223 | 204 | 204 | 200 | 204 | 200 | 206 | 204 | 206 | 198-232 |
| D21S1252 | 150 | 165 | 150 | 150 | 150 | 150 | 156 | 167 | 156 | 150 | 167 | 150 | 150 | 154 | 150 | 167 | 154 | 167 | 167 | 165 | 167 | 156 | 169 | 167 | 148-180 |
| D21S266  | 163 | 161 | 163 | 161 | 163 | 161 | 163 | 163 | 163 | 179 | 163 | 179 | 163 | 177 | 163 | 179 | 177 | 179 | 163 | 163 | 163 | 181 | 163 | 161 | 159-181 |

**Chromosome 22**

| Marker  | 5   |     | 20  |     | 18  |     | 1   |     | 12  |     | 11  |     | 7   |     | 21  |     | 24  |     | 8   |     | 25  |     | 26  |     | Size    |
|---------|-----|-----|-----|-----|-----|-----|-----|-----|-----|-----|-----|-----|-----|-----|-----|-----|-----|-----|-----|-----|-----|-----|-----|-----|---------|
| D22S420 | 160 | 160 | 160 | 158 | 160 | 156 | 162 | 158 | 162 | 156 | 162 | 158 | 158 | 162 | 158 | 158 | 158 | 158 | 162 | 158 | 160 | 162 | 160 | 166 | 156-172 |

|         |     |     |     |     |     |     |     |     |     |     |     |     |     |     |     |     |     |     |     |     |     |     |     |     |         |
|---------|-----|-----|-----|-----|-----|-----|-----|-----|-----|-----|-----|-----|-----|-----|-----|-----|-----|-----|-----|-----|-----|-----|-----|-----|---------|
| D22S539 | 205 | 205 | 205 | 205 | 205 | 205 | 205 | 205 | 205 | 205 | 205 | 211 | 205 | 205 | 205 | 215 | 205 | 207 | 205 | 205 | 205 | 215 | 205 | 205 | 203-221 |
| D22S315 | 194 | 198 | 194 | 200 | 194 | 200 | 198 | 194 | 198 | 204 | 198 | 204 | 200 | 198 | 200 | 200 | 200 | 194 | 198 | 200 | 198 | 204 | 198 | 200 | 184-214 |
| D22S280 | 222 | 218 | 222 | 224 | 218 | 214 | 218 | 222 | 218 | 218 | 218 | 222 | 216 | 222 | 216 | 218 | 216 | 214 | 222 | 216 | 222 | 220 | 222 | 214 | 216-228 |
| D22S283 | 141 | 155 | 141 | 155 | 155 | 145 | 149 | 141 | 149 | 139 | 149 | 145 | 153 | 149 | 153 | 139 | 153 | 143 | 149 | 153 | 149 | 141 |     |     | 132-160 |
| D22S423 | 296 | 304 | 296 | 308 | 304 | 302 | 296 | 296 | 296 | 304 | 296 | 300 | 308 | 296 | 308 | 310 | 308 | 298 | 308 | 296 | 308 | 296 | 308 | 298 | 290-312 |
| D22S274 | 287 | 297 | 287 | 297 | 287 | 287 | 287 | 283 | 287 | 285 | 283 | 285 | 285 | 283 | 285 | 287 |     |     | 287 | 285 | 287 | 287 | 285 | 285 | 280-302 |
